# Supplementary material for: Quality by Design as a Tool in the Optimisation of Nanoparticle Preparation—A Case Study of PLGA Nanoparticles
Source: MDPI journal article supplement (doi:10.3390/pharmaceutics15020617), 2023-02-12
Supplement: s1 [file s1]

# Supplementary information

**Table S1:** Results of definitive screening design.

| Run | Factors       |                |                          |                       |               |                            |                         | Response         |       |        |        |
|-----|---------------|----------------|--------------------------|-----------------------|---------------|----------------------------|-------------------------|------------------|-------|--------|--------|
|     | OVA conc. (%) | PLGA conc. (%) | w/o stirring speed (rpm) | w/o stirring time (s) | PVA conc. (%) | w/o/w stirring speed (rpm) | w/o/w stirring time (s) | z-average (d.nm) | PDI   | LE (%) | LC (%) |
| 1   | 2             | 3              | 9500                     | 60                    | 5             | 8000                       | 150                     | 558.83           | 0.366 | 11.52  | 2.98   |
| 2   | 4             | 9              | 9500                     | 90                    | 5             | 8000                       | 105                     | 1527.67          | 0.560 | 14.23  | 2.47   |
| 3   | 2             | 9              | 9500                     | 30                    | 5             | 13,500                     | 60                      | 594.13           | 0.374 | 15.05  | 1.32   |
| 4   | 2             | 9              | 20,500                   | 90                    | 2             | 8000                       | 60                      | 5565.00          | 1.000 | 22.68  | 1.98   |
| 5   | 4             | 9              | 20,500                   | 60                    | 2             | 13,500                     | 60                      | 2584.67          | 0.178 | 15.63  | 2.70   |
| 6   | 2             | 9              | 20,500                   | 30                    | 3.5           | 8000                       | 150                     | 1850.67          | 0.597 | 22.17  | 1.93   |
| 7   | 4             | 6              | 20,500                   | 30                    | 5             | 8000                       | 60                      | 1120.67          | 0.568 | 15.28  | 3.92   |
| 8   | 4             | 3              | 20,500                   | 90                    | 2             | 8000                       | 150                     | 2402.67          | 0.378 | 13.35  | 6.64   |
| 9   | 4             | 9              | 9500                     | 30                    | 2             | 8000                       | 150                     | 3304.33          | 0.271 | 16.72  | 2.89   |
| 10  | 2             | 3              | 20,500                   | 90                    | 5             | 13,500                     | 60                      | 443.90           | 0.280 | 13.13  | 3.38   |
| 11  | 2             | 6              | 9500                     | 90                    | 2             | 13,500                     | 150                     | 700.97           | 0.425 | 14.74  | 1.93   |
| 12  | 3             | 6              | 20,500                   | 60                    | 3.5           | 13,500                     | 105                     | 621.00           | 0.350 | 17.45  | 3.37   |
| 13  | 4             | 3              | 9500                     | 90                    | 3.5           | 13,500                     | 60                      | 596.90           | 0.401 | 8.10   | 4.14   |
| 14  | 3             | 9              | 20,500                   | 90                    | 5             | 13,500                     | 150                     | 689.13           | 0.360 | 23.95  | 3.09   |
| 15  | 4             | 3              | 9500                     | 30                    | 5             | 13,500                     | 150                     | 374.53           | 0.196 | 7.22   | 3.71   |
| 16  | 3             | 6              | 9500                     | 60                    | 3.5           | 8000                       | 105                     | 2129.67          | 0.583 | 11.55  | 2.26   |
| 17  | 2             | 3              | 20,500                   | 30                    | 2             | 13,500                     | 105                     | 510.73           | 0.331 | 15.24  | 3.90   |
| 18  | 3             | 3              | 9500                     | 30                    | 2             | 8000                       | 60                      | 1642.67          | 0.580 | 9.53   | 3.67   |
